# Supplementary material
Source: publisher figshare collection journal article supplement (https://aacr.figshare.com/articles/dataset/_/22545057)

# Figure S2

A

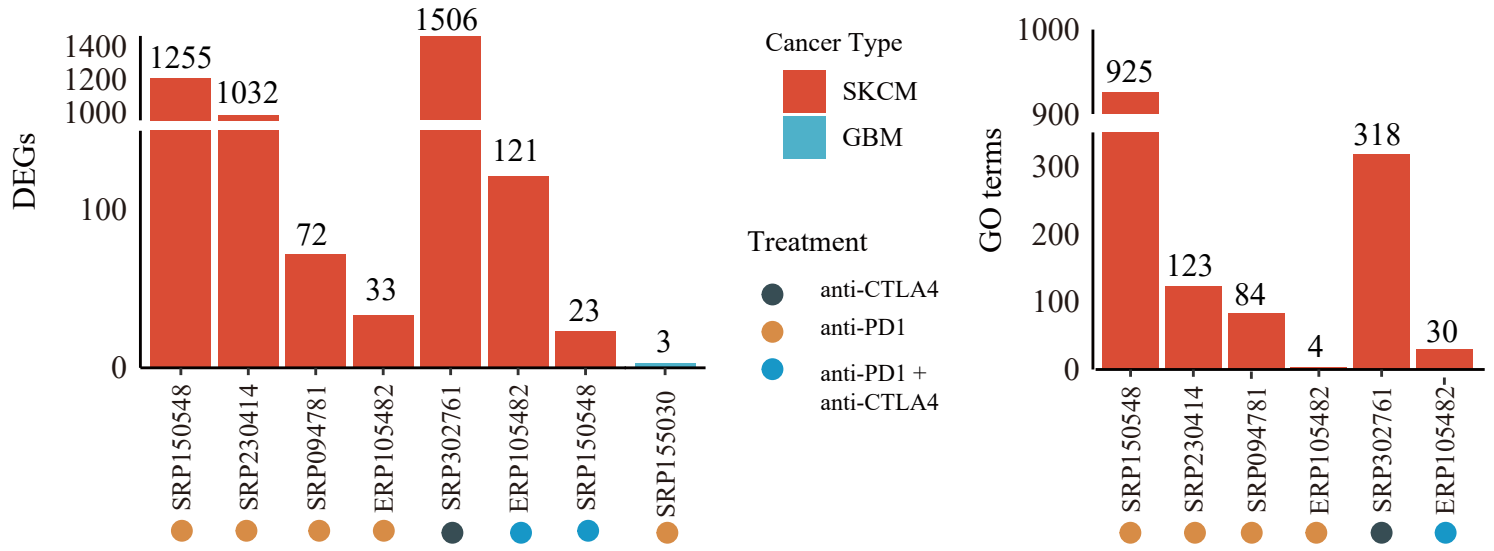

B

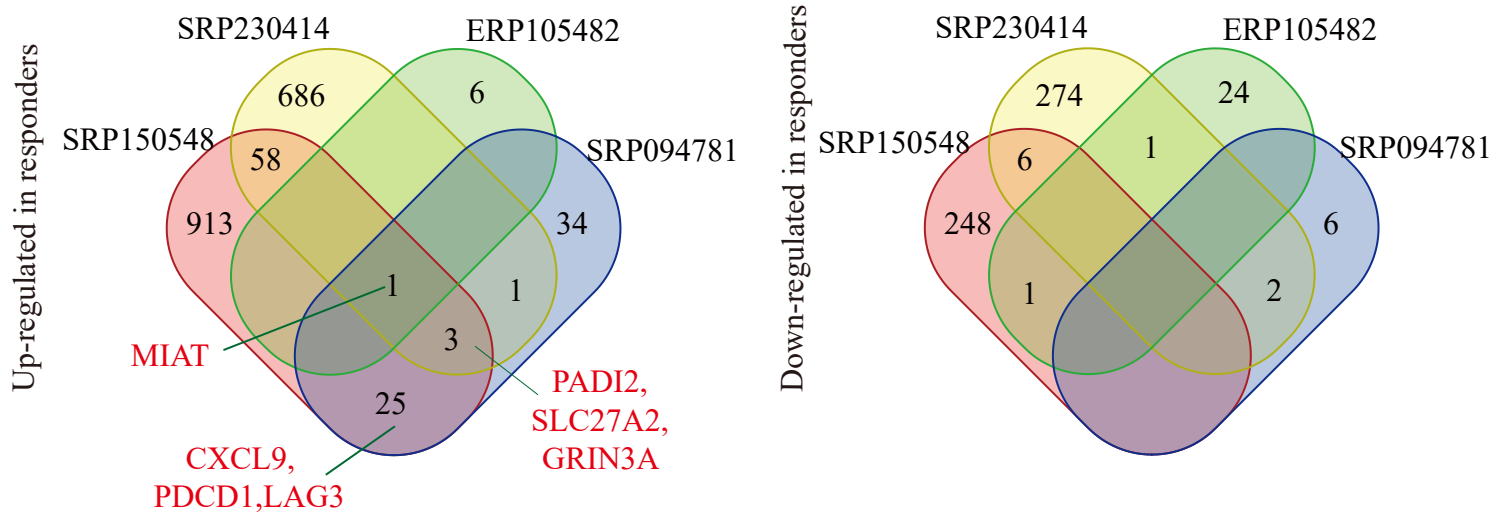

C

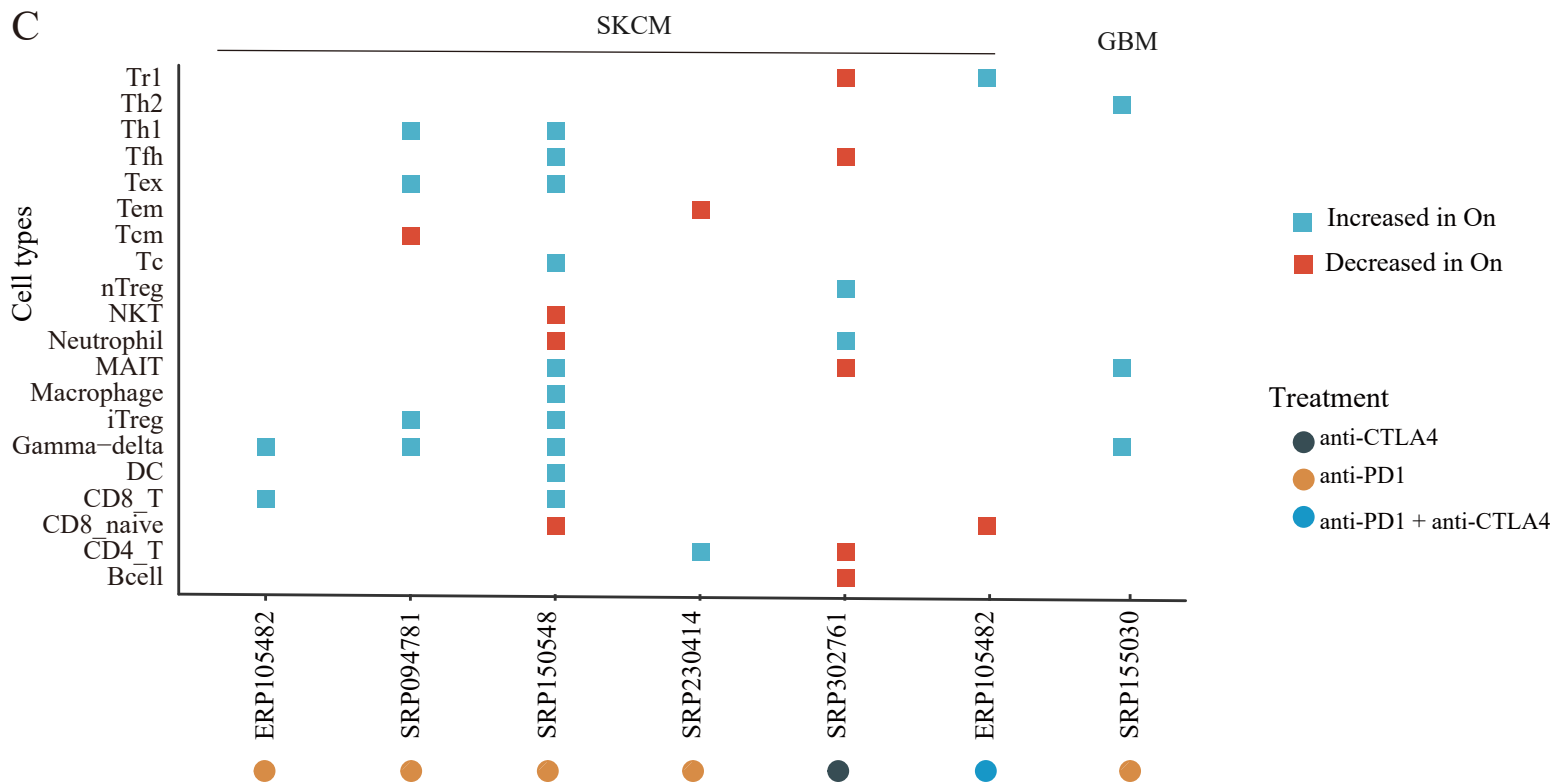

Supplement: Supplementary file 1 [file 40008486]
